# Supplementary material for: Impact of Site-Directed Mutant Luciferase on Quantitative Green and Orange/Red Emission Intensities in Firefly Bioluminescence
Source: PubMed Central journal article supplement — Sci Rep. 2013 Aug 23;3:2490. doi: 10.1038/srep02490 (PMC3750616; doi:10.1038/srep02490), 2013-08-23
Supplement: srep02490-s1.pdf [file srep02490-s1.pdf]

# Impact of Site-Directed Mutant Luciferase on Quantitative Green and Orange/Red Emission Intensities in Firefly Bioluminescence

Yu Wang<sup>1,2</sup>, Hidefumi Akiyama<sup>1</sup>, Kanako Terakado<sup>3</sup> & Toru Nakatsu<sup>3</sup>

<sup>1</sup>*Institute for Solid State Physics, University of Tokyo, Kashiwanoha 5-1-5, Kashiwa, Chiba 2778584, and JST-CREST, Japan*

<sup>2</sup>*Institute of Genetics and Developmental Biology, Chinese Academy of Sciences, Bei Chen Xi Lu 1-2, Chao Yang District, Beijing 100101, China*

<sup>3</sup>*Department of Structural Biology, Graduate School of Pharmaceutical Sciences, Kyoto University. 46-29 Yoshida Shimoadachi-cho, Sakyo-ku, Kyoto 606-8501, Japan*

## References

- [1] Ando, Y., et al. Firefly bioluminescence quantum yield and colour change by pH-sensitive green emission. *Nat. Photonics* **2** 44–47, 2007

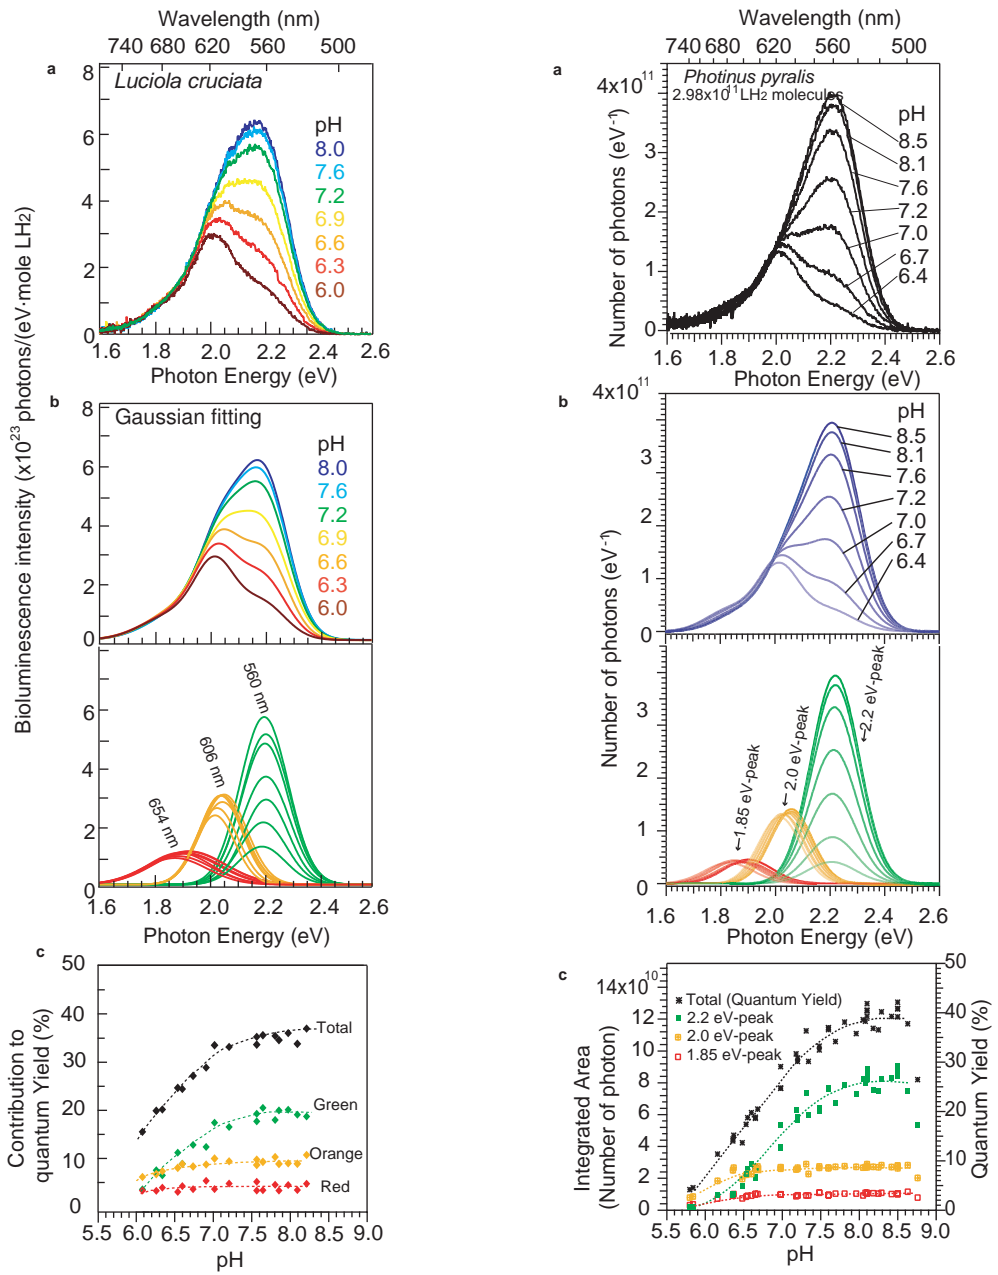

Figure 1: Comparison of wild type *Lcr* (left-side panel) and *Ppy* (right-side panel [1]) luciferase at various pH values: (a) Quantitative spectra; (b) The results of Gaussian curve fitting to the spectra in (a), and each Gaussian components; (c) the contributions of the integral area of each Gaussian component in (b) to quantum yield, shown with corresponding colour. The summations are shown with black colour. The scales of the vertical axes of the corresponding group are set to be equivalent.

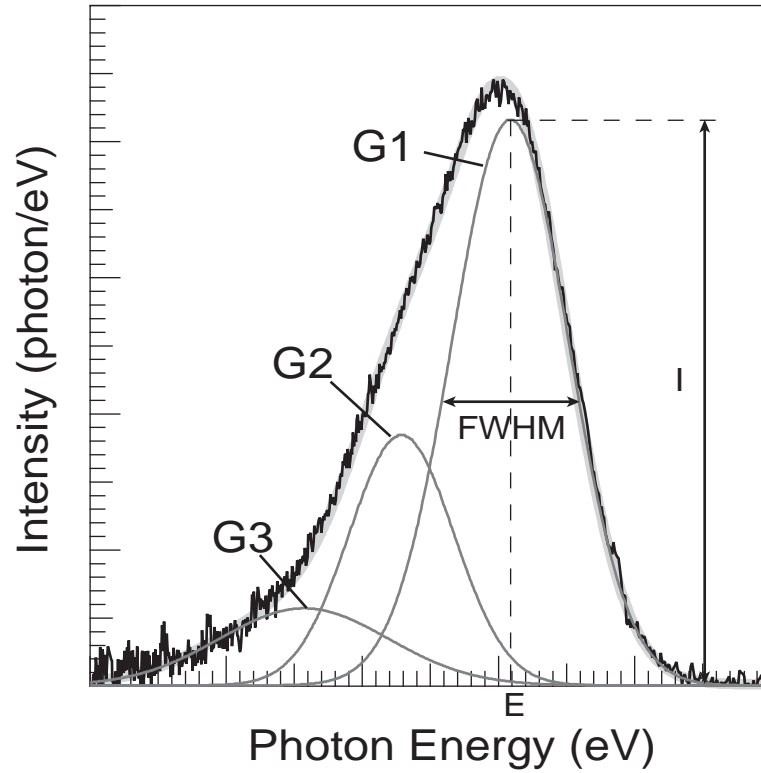

Figure 2: The experimental spectrum (black line) was reproduced with three Gaussian functions G1, G2, and G3 (dark gray lines). The peak intensity ( $I$ ), peak energy ( $E$ ), and full width at half maximum of the peak (FWHM) of the three Gaussian functions were adjusted to make their summation curve (light gray line) mimic the experimental spectrum.
